# Supplementary material for: Aberrant upregulation of the glycolytic enzyme PFKFB3 in CLN7 neuronal ceroid lipofuscinosis
Source: PubMed Central journal article supplement (PMC8795187; doi:10.1038/s41467-022-28191-1), 2022-01-27
Supplement: 41467_2022_28191_MOESM1_ESM.pdf [file 41467_2022_28191_MOESM1_ESM.pdf]

## Supplementary Information

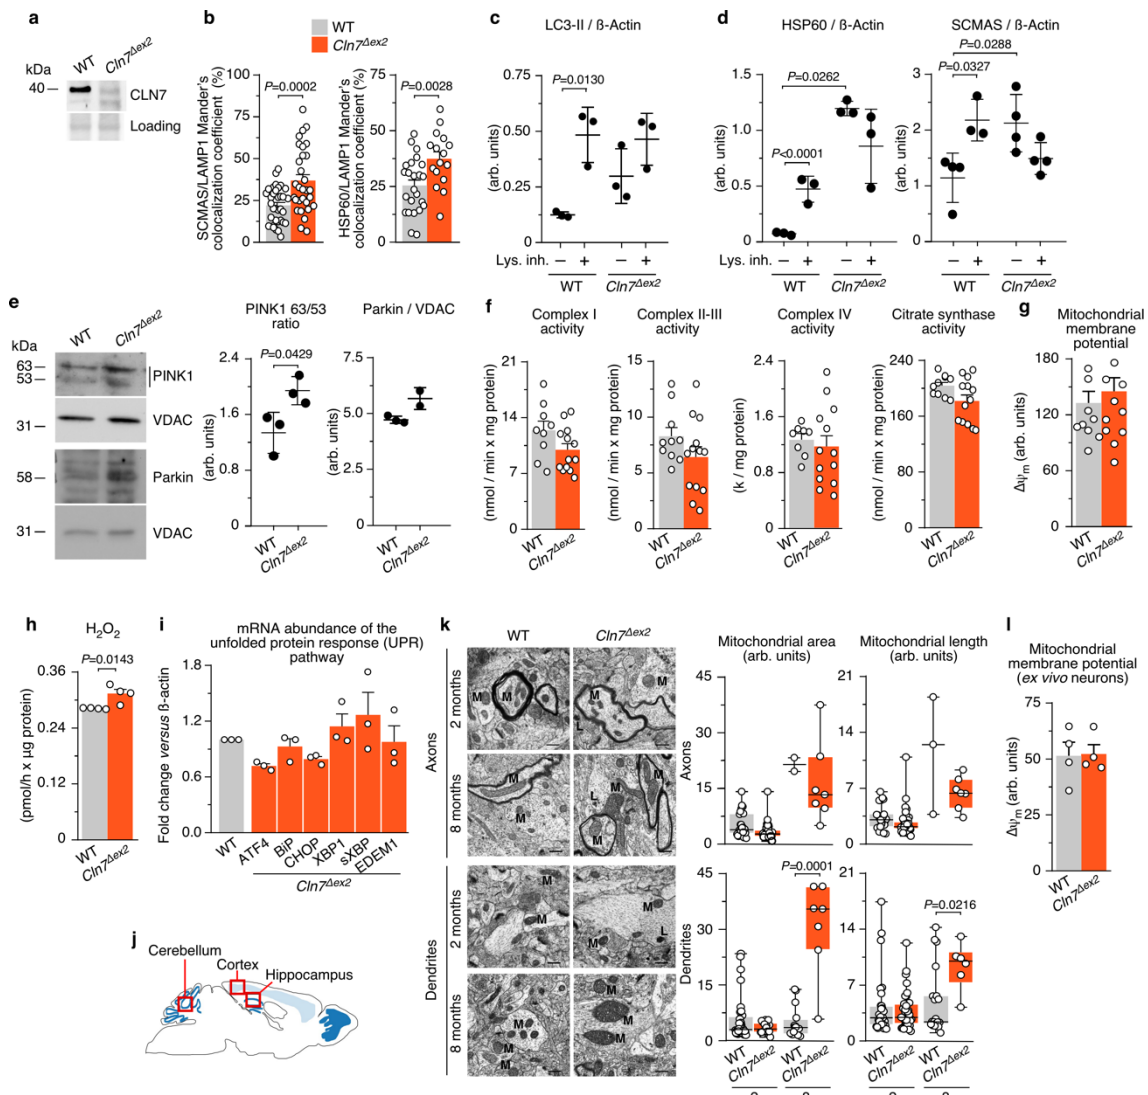

**Supplementary Fig. 1. Extended data to figure 1 on failure in autophagy causes accumulation of structural and functionally impaired mitochondria in *Cln7<sup>Δex2</sup>* mouse.**

**(a)** *Cln7* representative Western blot analysis in primary neurons (loading control Ponceau staining).

**(b)** Co-localization analyses of SCMAs/LAMP1 and HSP60/SCMAS in primary neurons of images shown in Fig. 1a (Mander's coefficient) . Data are mean  $\pm$  S.E.M. of  $n \geq 13$  neurons from  $n=3$  independent samples.

- (c)** Densitometric quantification of the Western blot bands shown in Fig. 1b and the replicas. Data are mean  $\pm$  S.D. from n=3 independent samples.
- (d)** Densitometric quantification of the Western blot bands shown in Fig. 1c and the replicas. Data are mean  $\pm$  S.D. from n=3 (HSP60), n=4 (SCMAS) independent samples.
- (e)** PINK1 Western blot analysis of 63 and 53 kDa bands, and Parkin Western blot in primary neuronal mitochondria (VDAC, loading control) (left). Densitometric quantification of the Western blot bands and the replicas (right). Data are mean  $\pm$  S.D. from n=3 or n=2 (Parkin-*Cln7<sup>Aex2</sup>*) independent samples.
- (f)** Activities of the mitochondrial respiratory chain complexes I, II-III and IV, and citrate synthase, in cell homogenates from primary neurons. Data are mean  $\pm$  S.E.M. from n $\geq$ 9 independent samples.
- (g)** Monitorization of mitochondrial membrane potential ( $\Delta\psi_m$ ) in primary neurons. . Data are mean  $\pm$  S.E.M. from n $\geq$ 11 independent samples.
- (h)** H<sub>2</sub>O<sub>2</sub> abundance as assessed by AmplexRed fluorescence in primary neurons (n=4). Data are mean  $\pm$  S.E.M. from n=4 independent samples.
- (i)** ATF4, BiP, CHOP, total XBP1 and spliced XBP1 (sXBP1) and EDEM1 mRNA analysis by RT-qPCR in primary neurons. Data are mean  $\pm$  S.E.M. from n=3 independent samples. (values normalized *versus*  $\beta$ -actin).
- (j)** Brain schema indicating the location of analyzed areas in cerebellum, cortex and hippocampus.
- (k)** Representative electron microscopy images (left) and analyses of mouse brain cortex mitochondrial area and length (right). Data are in box plots (the box extends from the 25<sup>th</sup> to 75<sup>th</sup> percentiles, the horizontal line indicates the median, and the whiskers go down to the smallest value and up to the largest) from n $\geq$ 2 mitochondria per condition . Scale bar, 500 nm. (M, mitochondria; L, lysosome).

**(l)** Monitorization of  $\Delta\psi_m$  in freshly isolated neurons from mouse brain cortex. Data are mean  $\pm$  S.E.M. from n=4 animals of 6 months-old).

Statistical analyses were performed by two tailed Student's t test (**b,e,f,g,h,i,k,l**) or one-way ANOVA followed by Tukey's post-hoc tests (**c,d**). Source data are provided as a Source Data file.

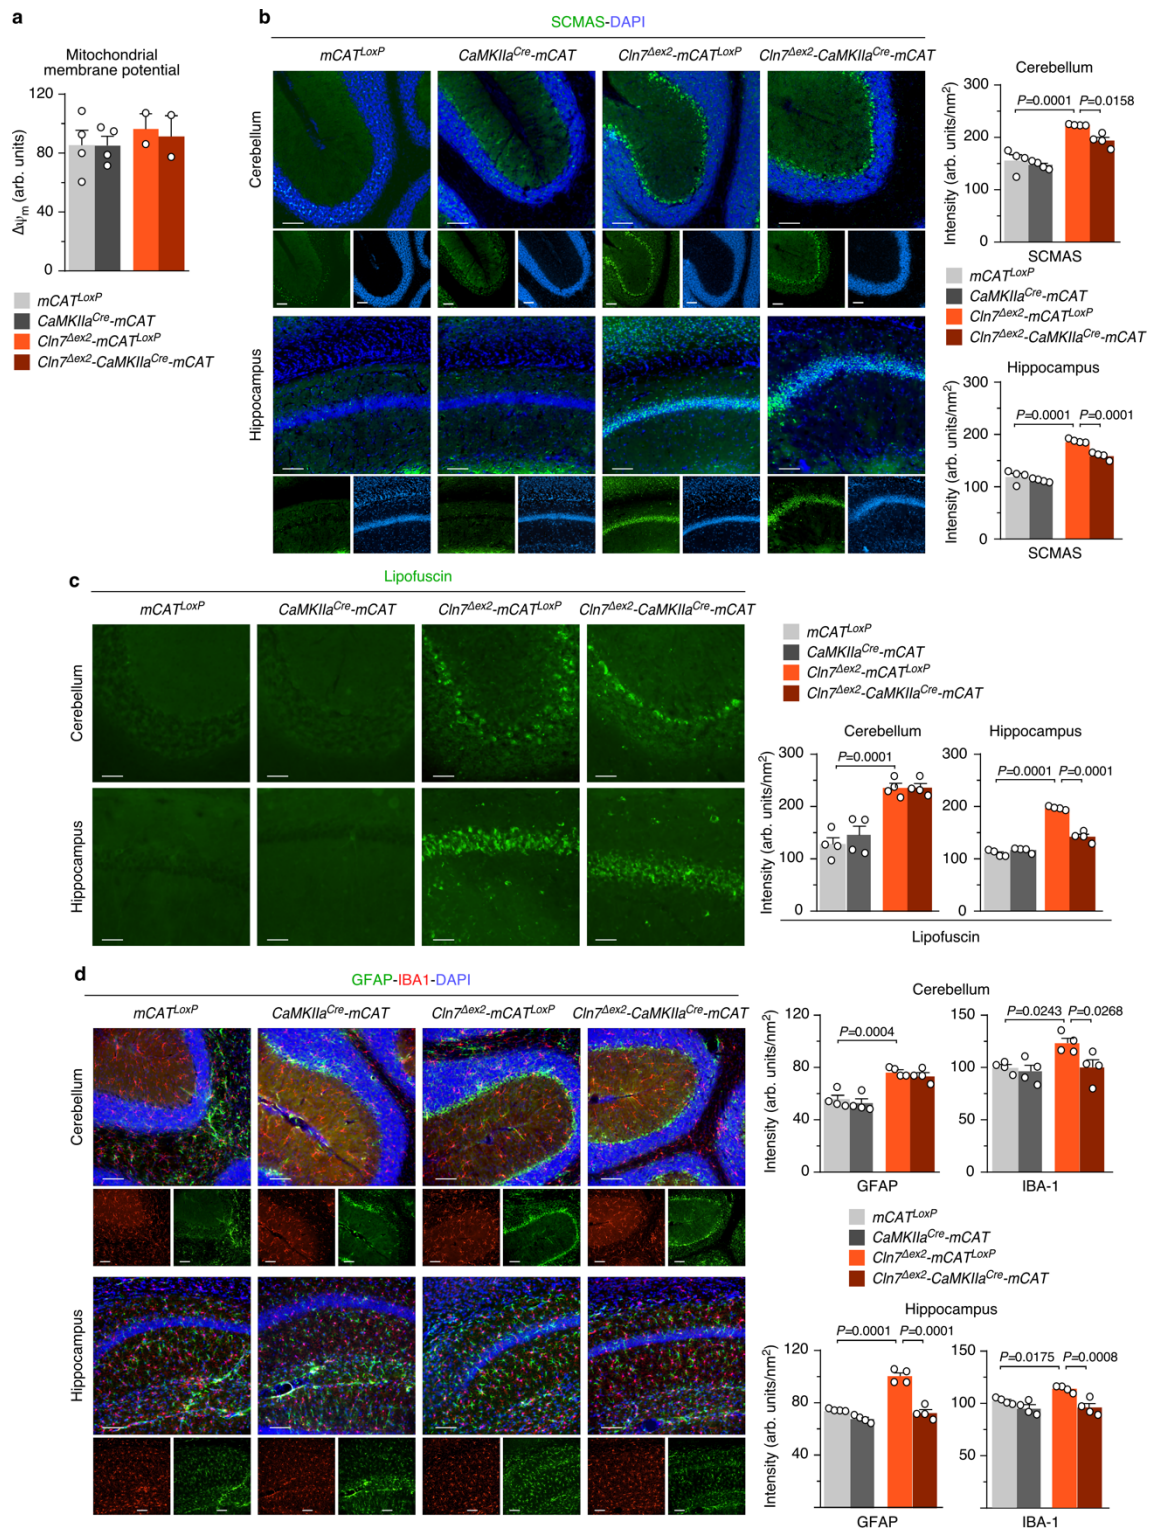

**Supplementary Fig. 2. Extended data to figure 2 on increased generation of mitochondrial ROS by neurons accounts for impaired mitochondrial accumulation and hallmarks of CLN7 disease in *Cln7*<sup>Δex2</sup> mouse in vivo.**

**(a)** Monitorization of  $\Delta\psi_m$  in primary neurons. Data are the mean  $\pm$  S.E.M. from n=4 (mCAT<sup>LoxP</sup>; CaMKIIa<sup>Cre</sup>-mCAT), n=2 (Cln7 <sup>$\Delta$ ex2</sup>-mCAT<sup>LoxP</sup>, Cln7 <sup>$\Delta$ ex2</sup>-CaMKIIa<sup>Cre</sup>-mCAT) independent samples.

**(b,c,d)** Representative images of SCMAS, lipofuscin, GFAP and IBA-1 immunohistochemical analysis of the mouse brain hippocampus and cerebellum. Data are mean  $\pm$  S.E.M. from 3 serial slices per 3 months-old mouse (n=4 mice; one-way ANOVA followed by post-hoc Tukey). Scale bar, 100  $\mu$ m.

Source data are provided as a Source Data file.

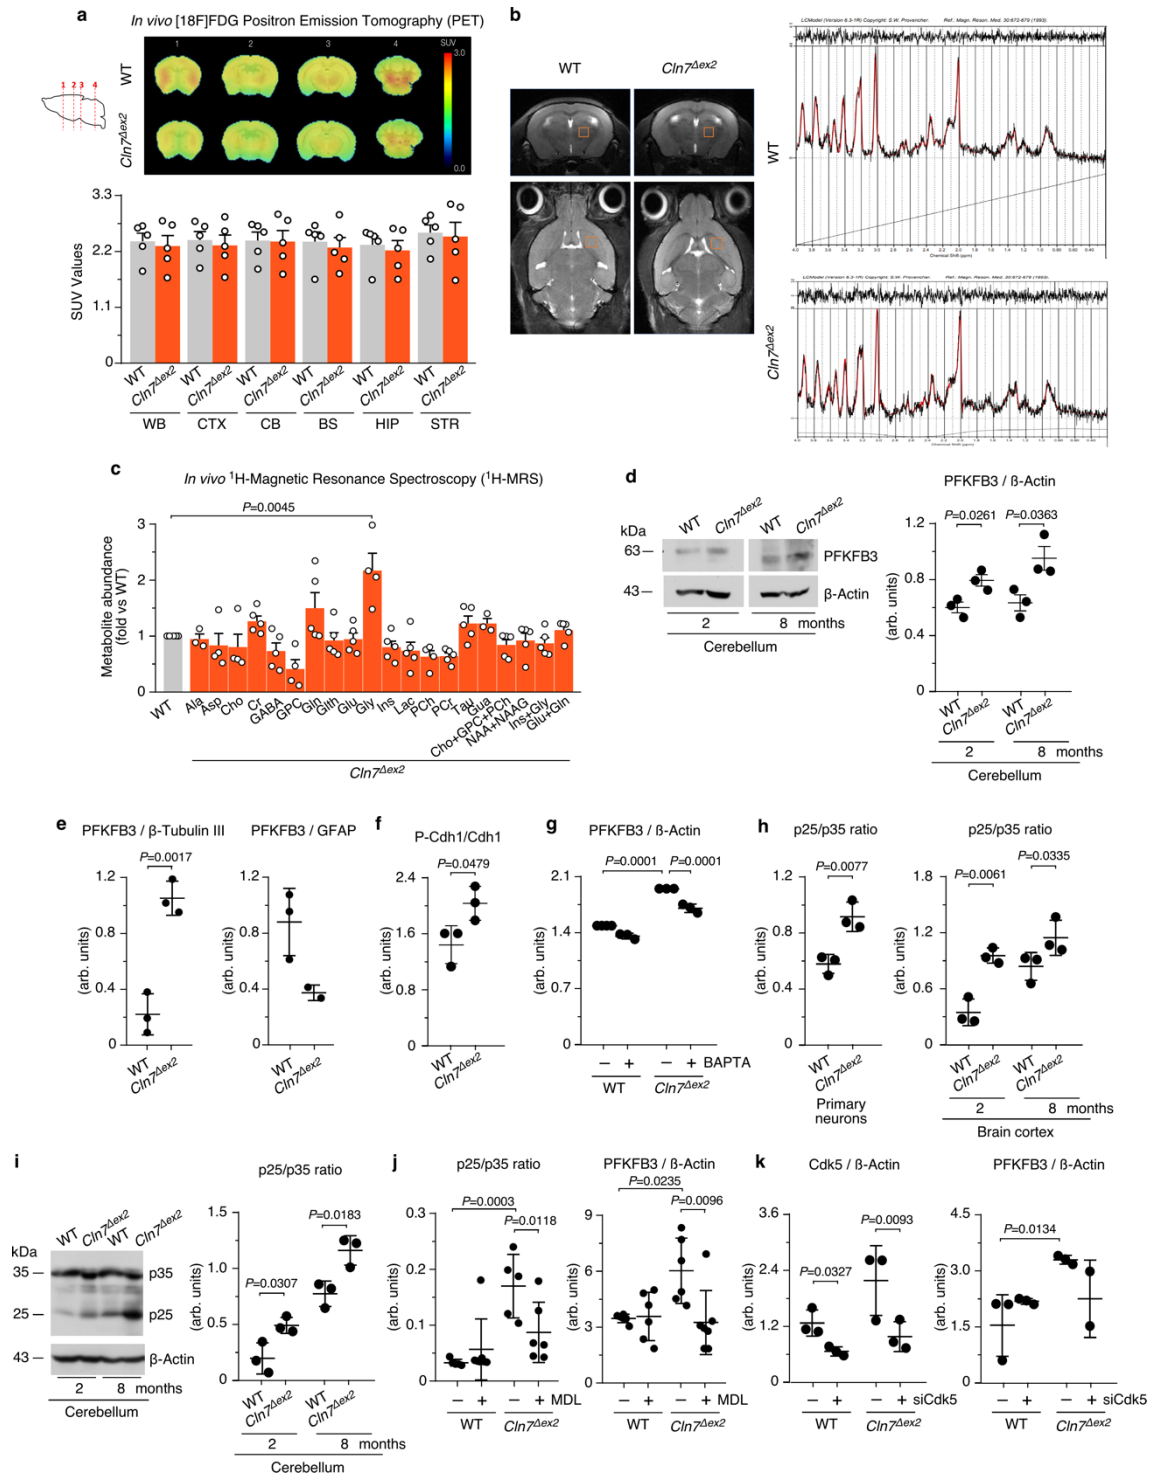

**Supplementary Fig. 3. Extended data to figure 3 on upregulation of PFKFB3 protein and activity *via* a Ca<sup>2+</sup>/calpain/Cdk5 pathway sustains a high glycolytic flux in *Cln7*<sup>Δex2</sup> neurons.**

**(a)** *In vivo* 2-[<sup>18</sup>F]fluoro-2-deoxy-D-glucose ([<sup>18</sup>F]FDG) uptake, as analyzed by positron emission tomography (PET) in whole brain (WB), cortex (CTX), cerebellum (CB),

brain stem (BS), hippocampus (HIP) and striatum (STR) in wild type and *Cln7<sup>Δex2</sup>* mice.

Data are mean  $\pm$  S.E.M. from n=5 animals of 5 months-old.

**(b)** Left-hand panel, MR brain images (transverse on top, coronal below) showing a typical location of an acquired voxel (colored box at the right striatum); right-hand panel, typical <sup>1</sup>H-MRS data showing acquired (black lines) and fitted (red lines) spectra.

**(c)** Data of the in vivo brain <sup>1</sup>H-MRS analysis. Data are mean  $\pm$  S.E.M. from n=5 animals of 3-months-old(analyzed area, striatum). (GPC, glycerophosphocholine; Ins, myo-inositol; PCh, phosphocholine; Gua, guanidoacetate).

**(d)** Representative Western blot showing PFKFB3 protein in cerebellum ( $\beta$ -actin, loading control) (left); densitometric quantification of these bands and replicas (right). Data are mean  $\pm$  S.D. from n=3.

**(e)** Densitometric quantification of the western blot bands and replicas shown in Fig. 3e. Data are mean  $\pm$  S.D. from n=3 animals of 6 months-old.

**(f,g,h)** Densitometric quantification of the western blot bands shown in Figs. 3h (e), 3j (f) and 3l (g), and replicas. Data are mean  $\pm$  S.D. from n=3 independent samples .

**(i)** Representative western blot showing p35 and its cleavage product p25 in cerebellum ( $\beta$ -actin, loading control) (left); densitometric quantification of these bands and replicas (right) Data are mean  $\pm$  S.D. from n=3 animals.

**(j,k)** Densitometric quantification of the western blot bands shown in Fig. 3m (j), Fig. 3n (k) and replicas. Data are mean  $\pm$  S.D. from n $\geq$ 4 (i), n=3 (j) independent samples.

Statistical analyses were performed by one-way ANOVA followed by Tukey's (g,j) or DMS's (j) post-hoc tests, or two tailed Student's t test (a,c,d,e,f,h,i). Source data are provided as a Source Data file.

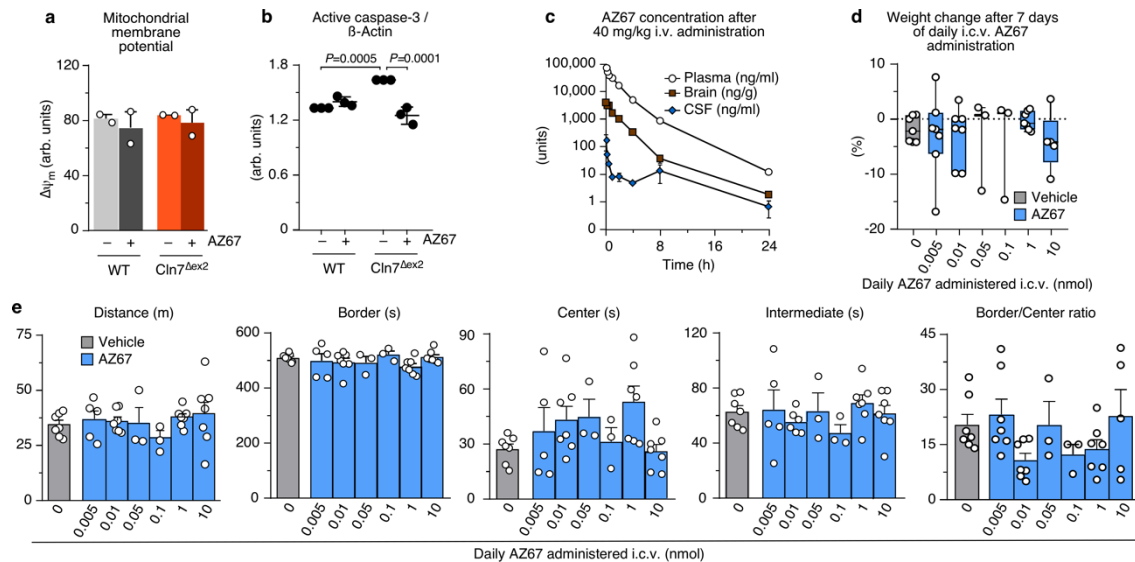

### Supplementary Fig. 4. Extended data to figure 4 on pharmacological targeting

#### PFKFB3 restores mitochondrial alterations of *Cln7*<sup>Δex2</sup> disease in vivo.

(a) Monitorization of  $\Delta\psi_m$  in primary neurons. Data are mean  $\pm$  S.E.M. from  $n=2$  independent samples.

(b) Densitometric quantification of the western blot bands shown in Fig. 4d replicas. Data are mean  $\pm$  S.D. from  $n=3$  independent samples.

(c) Time course evaluation of AZ67 concentration in plasma, brain and cerebrospinal fluid after the intravenous administration of 40 mg/kg of AZ67 in C57Bl/6 mice. Data are mean  $\pm$  S.E.M. from  $n=3$  animals. Related to Figs. 4e-g.

(d) Dose response evaluation of the weight fluctuations after 7 days of a daily intracerebroventricular injection of AZ67 (1 nmol/mouse).

Data are in box plots (the box extends from the 25<sup>th</sup> to 75<sup>th</sup> percentiles, the horizontal line indicates the median, and the whiskers go down to the smallest value and up to the largest) from  $n \geq 3$  animals of 2 months-old. Related to Figs. 4e-g.

(e) Dose response evaluation of the open field test after 7 days of a daily intracerebroventricular injection of AZ67 (1 nmol/mouse). Total distance, time spend in border, center and intermediate zone, and the ratio of border to center time are



represented. Data are mean  $\pm$  S.E.M. from  $n \geq 3$  animals of 5 months-old animals.

Related to Figs. 4e-g.

Statistical analyses were performed by one-way ANOVA followed by Tukey's post-hoc tests. Source data are provided as a Source Data file.

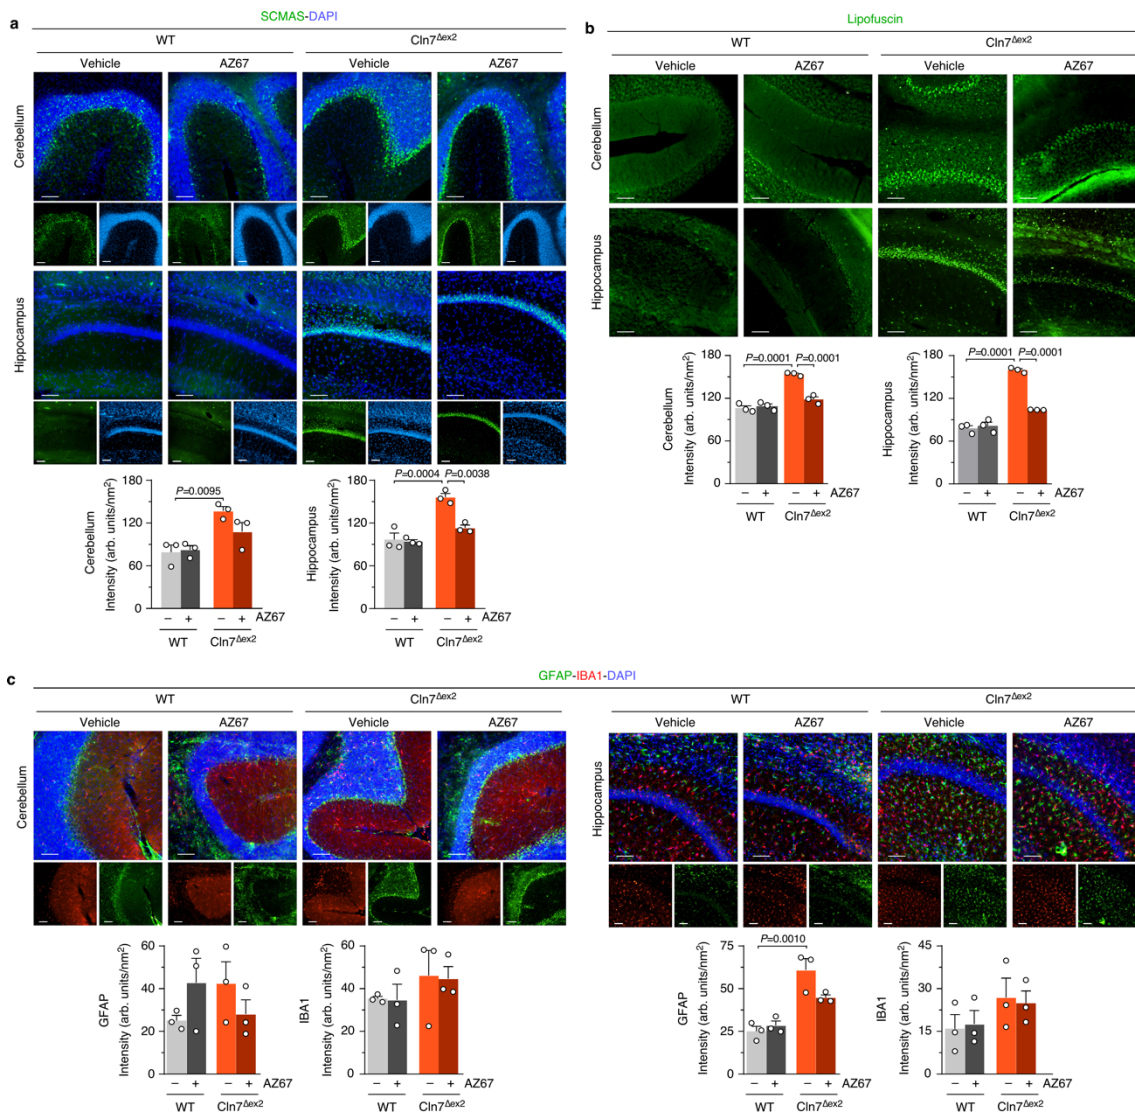

### Supplementary Fig. 5. Extended data to figure 5 on pharmacological targeting

#### PFKFB3 restores hallmarks of Cln7<sup>Δex2</sup> disease in vivo.

(a,b,c) Immunohistochemical analysis of the cerebellum and hippocampus of 3 months-old mice after 2 months of a daily intracerebroventricular administration of AZ67 (1 nmol/mouse) against SCMAS (a), lipofuscin (autofluorescence) (b), GFAP and IBA-1 (c). Data are mean ± S.E.M. from the quantification of 3 serial slices per mouse in n=3 mice (one-way ANOVA followed by Tukey's post-hoc test). Scale bar, 100 μm.

Source data are provided as a Source Data file.

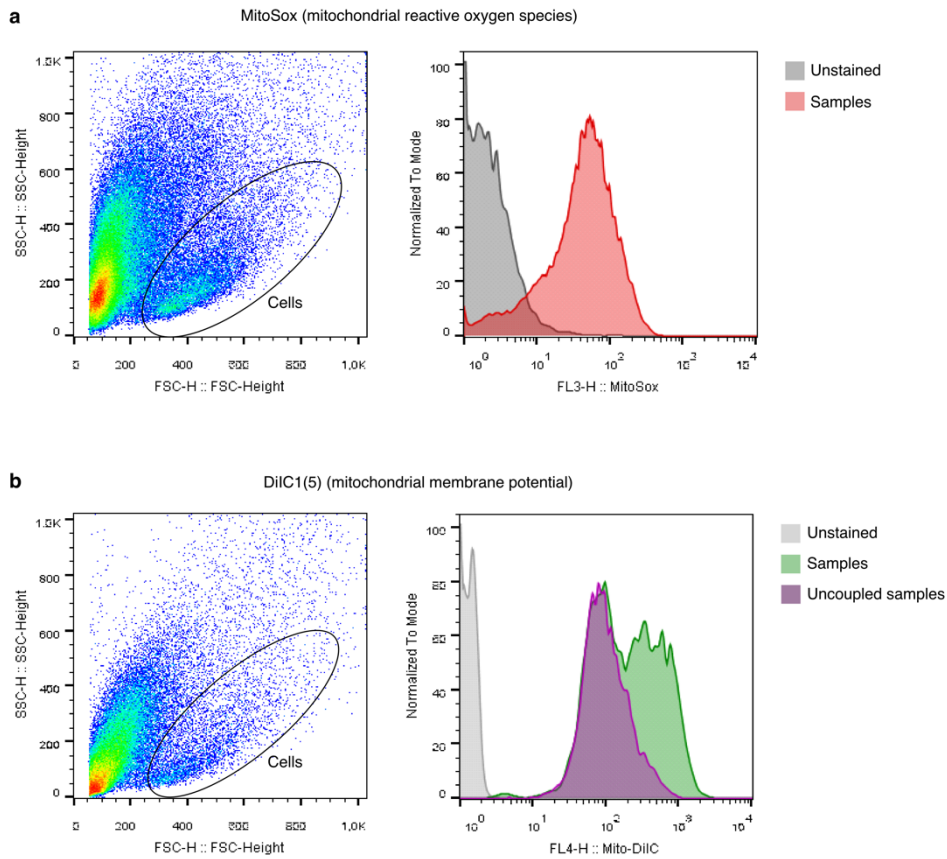

**Supplementary Fig. 6. Flow cytometry workflows.**

**(a)** MitoSox, to assess mitochondrial reactive oxygen species (mROS) in brain cells.

The median of the selected population was used.

**(b)** DiIC1(5), to assess mitochondrial membrane potential ( $\Delta\psi_m$ ) in brain cells.  $\Delta\psi_m$  is calculated subtracting, to the median of the selected population, the median of uncoupled population.

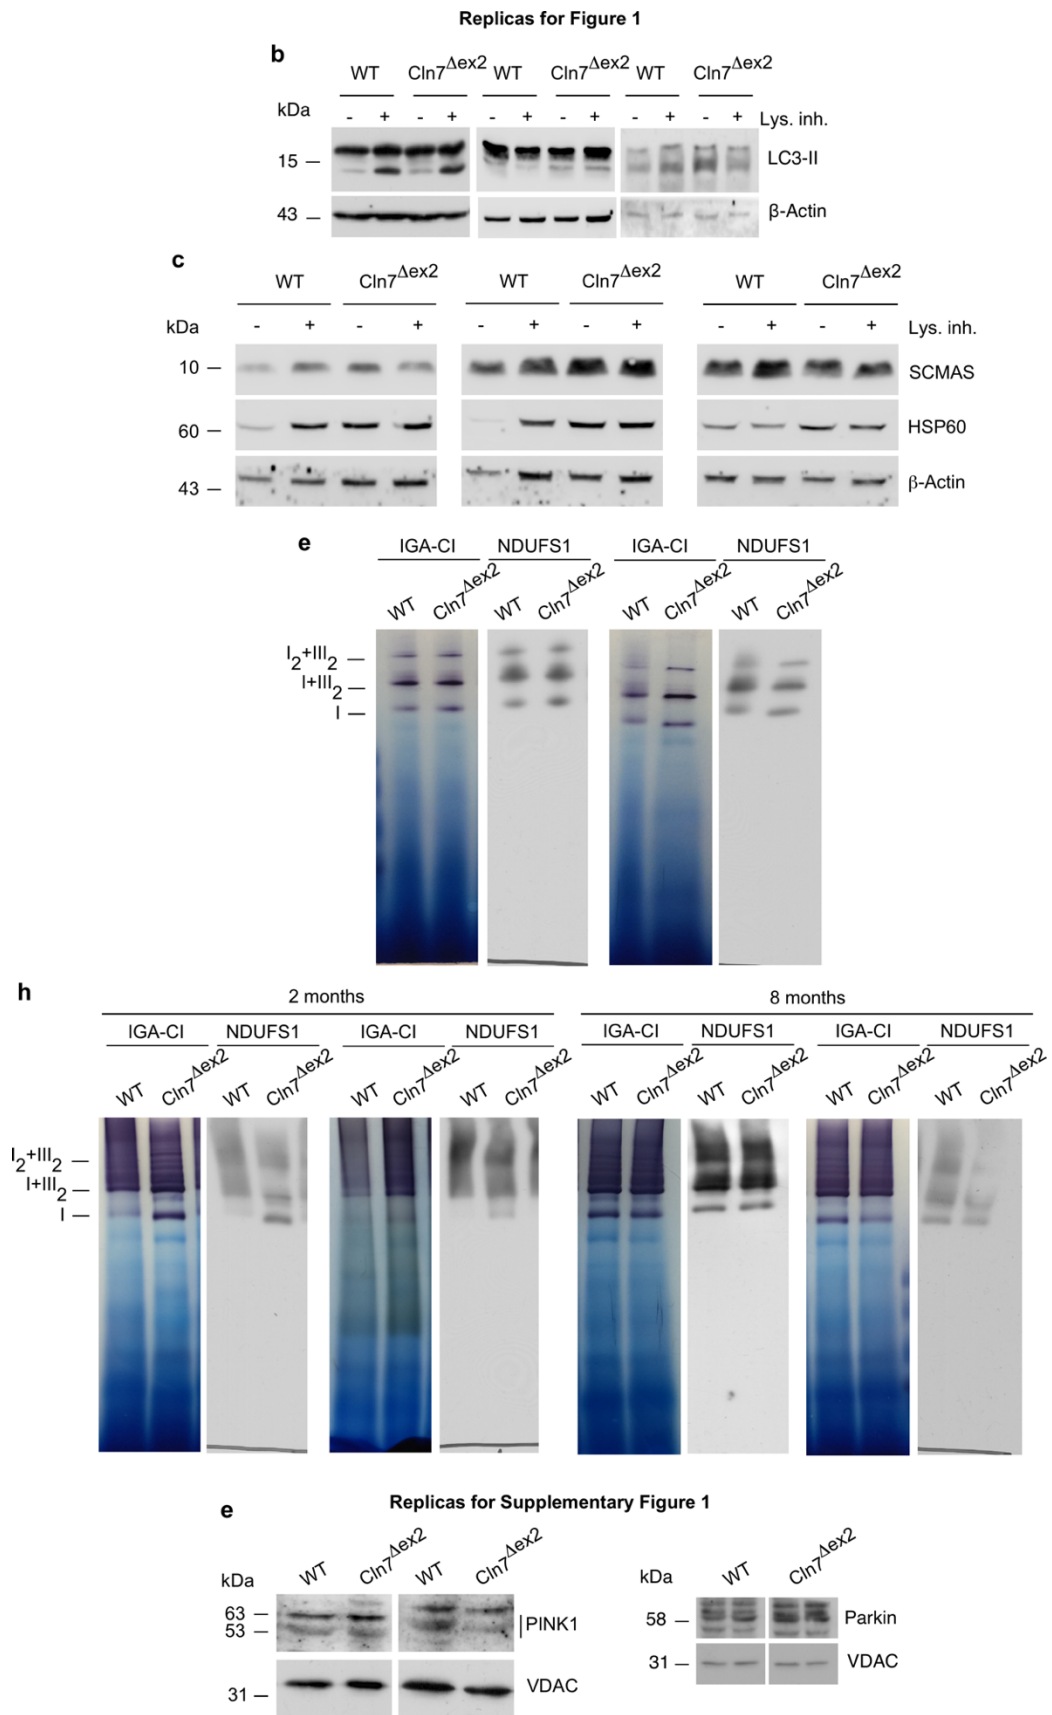

**Supplementary Figure 7. Western blots replica for Fig. 1 and Supplementary Fig.**

1.

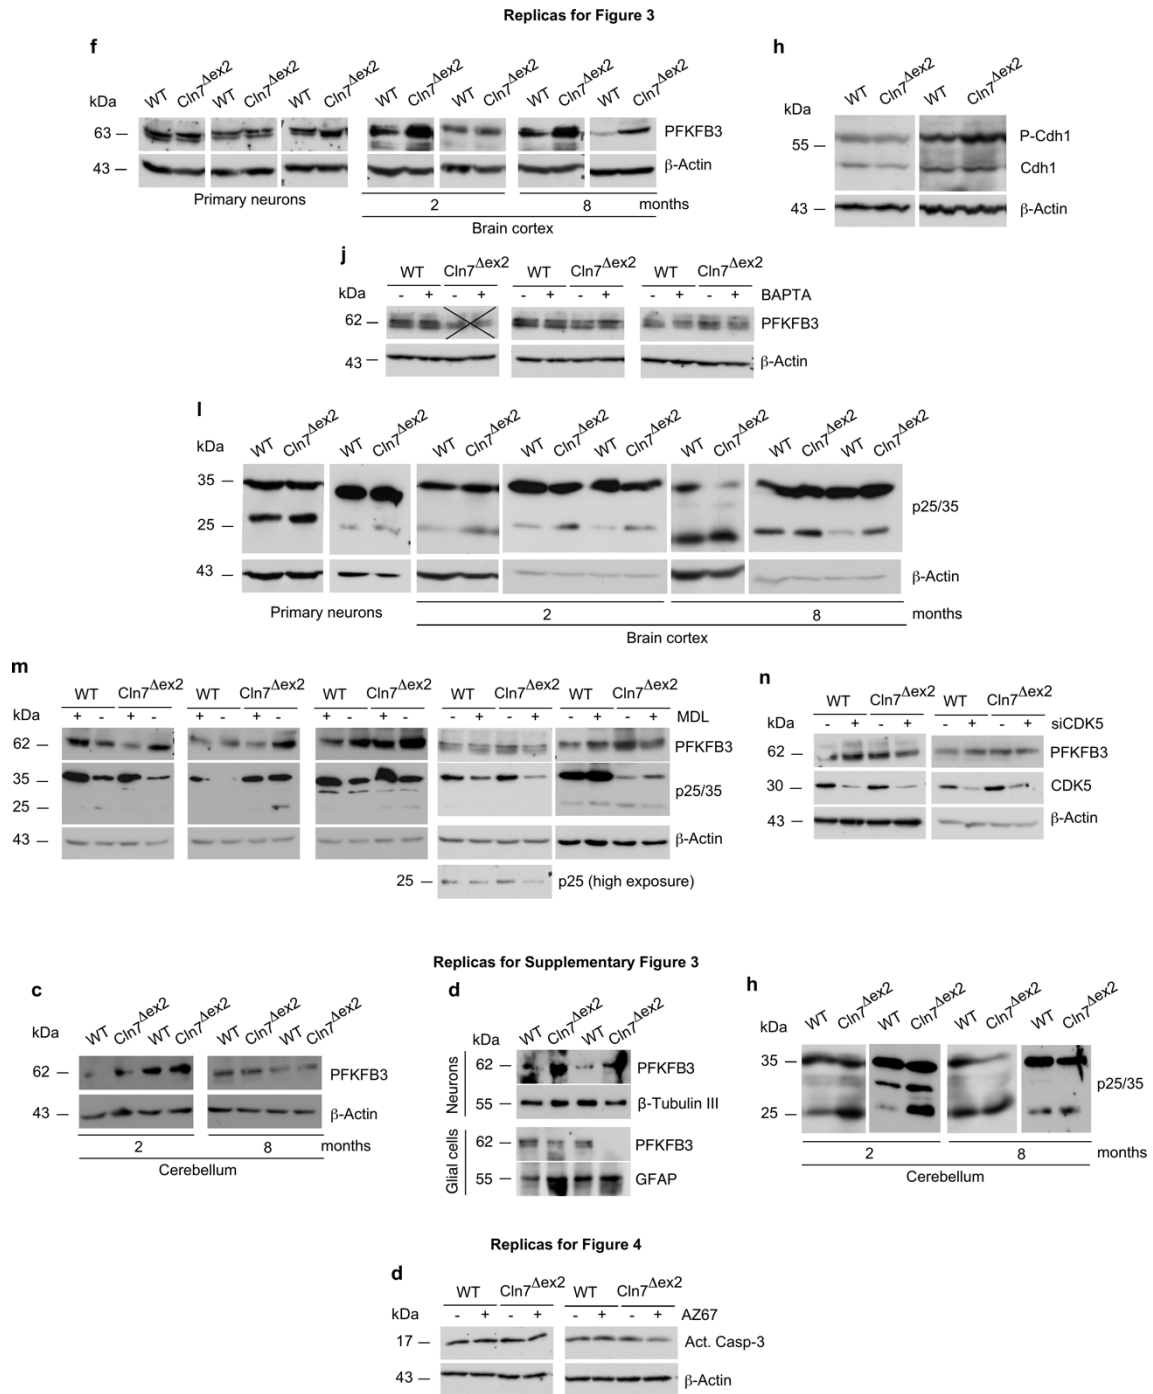

**Supplementary Figure 8. Western blots replica for Fig. 3, Supplementary Fig. 3 and Fig. 4.**

| Reagent or Resource                                 | Source                                                | Identifier                          |
|-----------------------------------------------------|-------------------------------------------------------|-------------------------------------|
| <b>Antibodies</b>                                   |                                                       |                                     |
| ATP-C                                               | Abcam                                                 | Cat# ab181243                       |
| VDAC                                                | Millipore                                             | Cat# PC548, RRID:AB_2257155         |
| HSP60                                               | Abcam                                                 | Cat# ab46798, RRID:AB_881444        |
| PINK1                                               | Santa Cruz Biotechnology                              | Cat# sc-33796, RRID:AB_2164259      |
| NDUFS1 (E-20)                                       | Santa Cruz Biotechnology                              | Cat# sc-50132, RRID:AB_2298398      |
| PFKFB3 (Clone 3F3)                                  | Novus Biologicals                                     | Cat# H00005209-M08, RRID:AB_1146566 |
| p35/25 (Clone C64B10)                               | Cell Signaling Technology                             | Cat# 2680, RRID:AB_1078214          |
| Cleaved Caspase-3 (Asp175)                          | Cell Signaling Technology                             | Cat# 9661, RRID:AB_2341188          |
| β-Actin                                             | Sigma                                                 | Cat# A5441, RRID:AB_476744          |
| CDK5 (J-3)                                          | Santa Cruz Biotechnology                              | Cat# sc-6247, RRID:AB_627241        |
| LAMP1                                               | DSHB                                                  | Cat# 1d4b, RRID:AB_2134500          |
| Parkin                                              | Santa Cruz Biotechnology                              | Cat# sc-32282, RRID:AB_628104       |
| OCT4                                                | Abcam                                                 | Cat# ab19857, RRID:AB_445175        |
| SOX2                                                | R&D Systems                                           | Cat# AF2018, RRID:AB_355110         |
| Nanog                                               | Abcam                                                 | Cat# ab21624, RRID:AB_446437        |
| Tra-1-60                                            | R&D Systems                                           | Cat# MAB1295, RRID:AB_2185575       |
| TUJ1                                                | R&D Systems                                           | Cat# MAB1195, RRID:AB_357520        |
| b-Tubulin III                                       | Abcam                                                 | Cat# ab18207, RRID:AB_444319        |
| ATP5A (Clone 15H4)                                  | Abcam                                                 | Cat# ab14748, RRID:AB_301447        |
| GFAP (Clone G-A-5)                                  | Sigma                                                 | Cat# G6171, RRID:AB_1840893         |
| Iba1                                                | Wako                                                  | Cat# 019-19741, RRID:AB_839504      |
| Nestin (Clone 10C2)                                 | Thermo Fisher                                         | Cat# MA1-110, RRID:AB_2536821       |
| LC3B                                                | Cell Signaling Technology                             | Cat# 2775, RRID:AB_915950           |
| Rabbit-HRP                                          | Santa Cruz Biotechnology                              | Cat# sc-2030, RRID:AB_631747        |
| Rabbit-HRP                                          | Biorad                                                | Cat# 170-6515, RRID:AB_11125142     |
| Mouse-HRP                                           | Biorad                                                | Cat# 170-6516, RRID:AB_11125547     |
| Goat-HRP                                            | Abcam                                                 | Cat# ab6741, RRID:AB_955424         |
| Cy2 goat anti-mouse                                 | Jackson Immuno-Research                               | Cat# 115-225-003, RRID:AB_2338740   |
| Cy3 goat anti-rabbit                                | Jackson Immuno-Research                               | Cat# 111-165-003, RRID:AB_2338000   |
| Cy3 streptavidin                                    | Jackson Immuno-Research                               | Cat# 016-160-084, RRID:AB_2337244   |
| CD45                                                | BD                                                    | Cat# 553076, RRID:AB_394606         |
| b-Tubulin III                                       | Sigma                                                 | Cat# T2200, RRID:AB_262133          |
| GFAP                                                | Millipore                                             | Cat# AB5541, RRID:AB_177521         |
| Alexa 488 donkey anti-rabbit                        | Molecular Probes                                      | Cat# A-31573, RRID:AB_2536183       |
| Alexa 647 goat anti-rat                             | Thermo Fisher                                         | Cat# A-21247, RRID:AB_141778        |
| Alexa 568 goat anti-mouse                           | Invitrogen                                            | Cat# A-11031, RRID:AB_144696        |
| Biotin anti-mouse                                   | Vector                                                | Cat# BA-2000, RRID:AB_2313581       |
| Alexa 488 goat anti-rabbit                          | Molecular Probes                                      | Cat# A-11008, RRID:AB_143165        |
| <b>Chemicals, Peptides and Recombinant Proteins</b> |                                                       |                                     |
| AZ PFKFB3 67                                        | Tocris                                                | Cat# 5742/10                        |
| MDL-28170                                           | Sigma                                                 | Cat# M6690                          |
| BAPTA                                               | Sigma                                                 | Cat# A1076                          |
| <b>Critical Commercial Assays</b>                   |                                                       |                                     |
| GenElute Mammalian Total RNA Miniprep Kit           | Sigma                                                 | Cat# RTN70                          |
| Power SYBR Green RNA-to-CT 1-Step kit               | Applied Biosystems                                    | Cat# 4391178                        |
| Ad5CMV-eGFP                                         | University of Iowa Viral Vector Core                  | Cat# U of Iowa-4 Ad5CMV-eGFP        |
| Ad5CMVCre-eGFP                                      | University of Iowa Viral Vector Core                  | Cat# U of Iowa-1174 Ad5CMVCre-eGFP  |
| Neurobasal-A                                        | Thermo Fisher                                         | Cat# 10888-022                      |
| B27                                                 | Thermo Fisher                                         | Cat# 17504001                       |
| Adult Brain Dissociation Kit                        | Miltenyi                                              | Cat# 130-107-677, RRID: SCR_020295  |
| Neuron Isolation Kit, mouse                         | Miltenyi                                              | Cat# 130-115-39                     |
| siCDK5                                              | Thermo Fisher                                         | Cat# s201147                        |
| siControl                                           | Thermo Fisher                                         | Cat# 4390843                        |
| Lipofectamine RNAiMAX                               | Thermo Fisher                                         | Cat# 13778075                       |
| NativePAGE Novex 3-12%                              | Thermo Fisher                                         | Cat# BN1001BOX                      |
| MitoSOX                                             | Thermo Fisher                                         | Cat# M36008                         |
| AmplexRed                                           | Thermo Fisher                                         | Cat# A22177                         |
| DiIC1 (5) Assay Kit                                 | Thermo Fisher                                         | Cat# M34151                         |
| Fura-2 AM                                           | Thermo Fisher                                         | Cat# F1201                          |
| Pierce BCA Protein Assay Kit                        | Thermo Fisher                                         | Cat# 23225                          |
| <b>Software and Algorithms</b>                      |                                                       |                                     |
| Seahorse Wave Desktop Software 2.6.1.56             | Agilent                                               | RRID:SCR_014526                     |
| ANY-Maze                                            | HUGO Basile                                           | RRID:SCR_014289                     |
| ImageJ                                              | <a href="https://imagej.net/">https://imagej.net/</a> | RRID:SCR_003070                     |
| Tecnaï Spirit TEM                                   | FEI                                                   |                                     |
| Harmony 4.0                                         | Perkin Elmer                                          |                                     |
| Adobe Photoshop CC                                  | Adobe                                                 | RRID:SCR_014199                     |
| Prism v8                                            | GraphPad                                              | RRID:SCR_002798                     |
| IBM SPSS                                            |                                                       | RRID:SCR_019096                     |
| FlowJo v10                                          |                                                       | RRID:SCR_008520                     |
| Fluoview FV10-ASW                                   | Olympus                                               | RRID:SCR_014215                     |

**Table RRID Identifiers.** Information on commercial sources and catalog numbers of antibodies, peptides, plasmids, kits, software and algorithms.
